# Supplementary material for: Delays to Antibiotics in the Emergency Department and Risk of Mortality in Children With Sepsis
Source: PubMed Central journal article supplement (PMC11154154; doi:10.1001/jamanetworkopen.2024.13955), 2024-06-05
Supplement: jamanetwopen-e2413955-s002.pdf [file jamanetwopen-e2413955-s002.pdf]

## Data Sharing Statement

Lane. Delays to Antibiotics in the Emergency Department and Risk of Mortality in Children with Sepsis. *JAMA Netw Open*. Published June 05, 2024.

doi:10.1001/jamanetworkopen.2024.13955

### Data

**Data available:** No

### Additional Information

**Explanation for why data not available:** We could provide a data dictionary but would be unable to provide individual patient data at this time while the collaborative is still active.
